# Supplementary material for: The Impact of 10 Unmalted Alternative Adjuncts on Wort Characteristics
Source: MDPI journal article supplement (doi:10.3390/foods12234206), 2023-11-22
Supplement: s1 [file s1]

|                | TKW (g/dm) | Starch (% dm) | Protein (% dm) | Fat (% dm) | Beta-glucan (% dm) | Mg (mg/kg dm) | K (mg/kg dm) | Ca (mg/kg dm) | P (mg/kg dm) | Diastatic power ("WK) | Alpha-amylase (CU/g dm) | Beta-amylase (BU/g dm) | Gelatinization T (°C) | C-Saccharification time (min) | C-Filtrate mass after 60 min (g) | C-Extract content (°P) | C-pH   | C-FAN (mg/L) | C-Glucose (g/L) | C-Maltose (g/L) | C-Maltotriose (g/L) | C-Maltotetraose (g/L) | C-Maltopentaose (g/L) | C-Viscosity (mPas) | C-Polyphenol content (mg/L) | C-Soluble protein (g/L) | C-Beta-glucan (mg/L) | C-Color (EBC) |
|----------------|------------|---------------|----------------|------------|--------------------|---------------|--------------|---------------|--------------|-----------------------|-------------------------|------------------------|-----------------------|-------------------------------|----------------------------------|------------------------|--------|--------------|-----------------|-----------------|---------------------|-----------------------|-----------------------|--------------------|-----------------------------|-------------------------|----------------------|---------------|
| TKW (g/dm)     | 1.000      | -0.129        | 0.404          | -0.810     | 0.772              | -0.684        | -0.077       | -0.598        | -0.319       | 0.835                 | 0.197                   | 0.714                  | -0.712                | -0.377                        | 0.513                            | 0.634                  | -0.502 | 0.006        | -0.691          | 0.822           | 0.579               | 0.126                 | -0.007                | 0.334              | -0.187                      | 0.666                   | 0.639                | -0.359        |
|                | 0.453      | 0.015         | <0.001         | <0.001     | <0.001             | <0.001        | 0.655        | <0.001        | 0.058        | <0.001                | 0.250                   | <0.001                 | <0.001                | 0.024                         | 0.001                            | <0.001                 | 0.002  | 0.971        | <0.001          | <0.001          | <0.001              | 0.464                 | 0.968                 | 0.046              | 0.274                       | <0.001                  | <0.001               | 0.031         |
| Starch (%dm)   | -0.129     | 1.000         | -0.161         | 0.092      | -0.189             | 0.148         | -0.399       | -0.469        | -0.369       | -0.471                | -0.248                  | -0.309                 | 0.386                 | 0.651                         | 0.047                            | 0.302                  | -0.176 | -0.266       | 0.337           | -0.026          | 0.100               | 0.458                 | 0.620                 | 0.292              | -0.060                      | -0.181                  | -0.291               | -0.209        |
|                | 0.453      | 0.015         | 0.349          | 0.594      | 0.270              | 0.389         | 0.016        | 0.004         | 0.027        | 0.004                 | 0.144                   | 0.067                  | 0.020                 | <0.001                        | 0.787                            | 0.074                  | 0.304  | 0.117        | 0.044           | 0.879           | 0.561               | 0.005                 | 0.001                 | 0.084              | 0.726                       | 0.290                   | 0.085                | 0.222         |
| Protein (%dm)  | 0.404      | -0.161        | 1.000          | -0.255     | -0.011             | 0.225         | -0.397       | -0.206        | 0.094        | 0.444                 | 0.195                   | 0.359                  | -0.060                | -0.636                        | -0.153                           | 0.066                  | 0.197  | 0.369        | -0.038          | 0.344           | 0.230               | -0.138                | -0.161                | 0.319              | -0.591                      | 0.635                   | -0.176               | -0.574        |
|                | 0.015      | 0.349         | 0.018          | 0.134      | 0.948              | 0.188         | 0.017        | 0.228         | 0.587        | 0.007                 | 0.255                   | 0.031                  | 0.970                 | <0.001                        | 0.734                            | 0.704                  | 0.250  | 0.027        | 0.827           | 0.040           | 0.177               | 0.421                 | 0.347                 | 0.058              | <0.001                      | <0.001                  | 0.304                | -0.001        |
| Fat (%dm)      | -0.810     | 0.092         | -0.255         | 1.000      | -0.793             | 0.731         | 0.097        | 0.343         | 0.318        | -0.676                | -0.170                  | -0.754                 | 0.747                 | 0.358                         | -0.542                           | -0.499                 | 0.579  | -0.133       | 0.694           | -0.810          | -0.597              | -0.345                | -0.074                | 0.063              | 0.376                       | -0.509                  | -0.655               | 0.166         |
|                | <0.001     | 0.594         | 0.134          | <0.001     | <0.001             | <0.001        | 0.574        | 0.041         | 0.059        | <0.001                | 0.323                   | <0.001                 | <0.001                | 0.032                         | <0.001                           | 0.002                  | <0.001 | 0.438        | <0.001          | <0.001          | 0.039               | 0.669                 | 0.716                 | 0.024              | 0.002                       | <0.001                  | 0.332                | 0.001         |
| b-glucan (%dm) | 0.772      | -0.189        | -0.011         | -0.793     | 1.000              | -0.729        | 0.229        | -0.242        | -0.136       | 0.714                 | 0.258                   | 0.702                  | -0.857                | -0.122                        | 0.498                            | 0.491                  | -0.458 | -0.148       | -0.836          | 0.693           | 0.407               | 0.104                 | -0.120                | 0.153              | -0.014                      | 0.432                   | 0.831                | -0.028        |
|                | <0.001     | 0.270         | 0.948          | <0.001     | <0.001             | <0.001        | 0.178        | 0.156         | 0.428        | <0.001                | 0.129                   | <0.001                 | <0.001                | 0.479                         | <0.001                           | 0.002                  | 0.002  | 0.005        | 0.390           | <0.001          | <0.001              | 0.144                 | 0.546                 | 0.487              | 0.372                       | 0.935                   | 0.009                | 0.869         |
| Mg (mg/kg dm)  | -0.684     | 0.148         | 0.225          | 0.731      | -0.729             | 1.000         | 0.007        | 0.313         | 0.555        | -0.529                | 0.080                   | -0.518                 | 0.686                 | 0.124                         | -0.705                           | -0.425                 | 0.800  | 0.175        | 0.680           | -0.662          | -0.595              | -0.396                | -0.125                | 0.114              | 0.011                       | -0.153                  | -0.765               | -0.091        |
|                | <0.001     | 0.389         | 0.188          | <0.001     | <0.001             | <0.001        | 0.970        | 0.063         | <0.001       | <0.001                | 0.642                   | 0.001                  | <0.001                | 0.472                         | <0.001                           | 0.010                  | <0.001 | 0.307        | <0.001          | <0.001          | 0.017               | 0.469                 | 0.508                 | 0.950              | 0.373                       | <0.001                  | 0.596                | 0.001         |
| K (mg/kg dm)   | -0.077     | -0.399        | -0.397         | 0.097      | 0.229              | 0.007         | 1.000        | 0.108         | 0.515        | 0.118                 | 0.330                   | 0.037                  | -0.279                | 0.148                         | 0.047                            | 0.044                  | 0.369  |              |                 |                 |                     |                       |                       |                    |                             |                         |                      |               |

|                               | TKW (g/dm) | Starch (% dm) | Protein (% dm) | Fat (% dm) | Beta-glucan (% dm) | Mg (mg/kg dm) | K (mg/kg dm) | Ca (mg/kg dm) | P (mg/kg dm) | Diastatic power ("WK) | Alpha-amylase (CU/g dm) | Beta-amylase (BU/g dm) | Gelatinization T (°C) | C-Saccharification time (min) | C-Filtrate mass after 60 min (g) | C-Extract content (°P) | C-pH   | C-FAN (mg/L) | C-Glucose (g/L) | C-Maltose (g/L) | C-Maltotriose (g/L) | C-Maltotetraose (g/L) | C-Maltopentaoase (g/L) | C-Viscosity (mPas) | C-Polyphenol content (mg/L) | C-Soluble protein (g/L) | C-Beta-glucan (mg/L) | C-Color (EBC) |
|-------------------------------|------------|---------------|----------------|------------|--------------------|---------------|--------------|---------------|--------------|-----------------------|-------------------------|------------------------|-----------------------|-------------------------------|----------------------------------|------------------------|--------|--------------|-----------------|-----------------|---------------------|-----------------------|------------------------|--------------------|-----------------------------|-------------------------|----------------------|---------------|
| TKW (g/dm)                    | 1.000      | -0.129        | 0.404          | -0.810     | 0.772              | -0.684        | -0.077       | -0.598        | -0.319       | 0.835                 | 0.197                   | 0.714                  | -0.712                | -0.377                        | 0.513                            | 0.634                  | -0.502 | 0.006        | -0.691          | 0.822           | 0.579               | 0.126                 | -0.007                 | 0.334              | -0.187                      | 0.666                   | 0.639                | -0.359        |
|                               | 0.453      | 0.015         | <0.001         | <0.001     | <0.001             | <0.001        | 0.655        | <0.001        | 0.058        | <0.001                | 0.250                   | <0.001                 | <0.001                | 0.024                         | 0.001                            | <0.001                 | 0.002  | 0.971        | <0.001          | <0.001          | <0.001              | 0.464                 | 0.968                  | 0.046              | 0.274                       | <0.001                  | <0.001               | 0.031         |
| Starch (%dm)                  | -0.129     | 1.000         | -0.161         | 0.092      | -0.189             | 0.148         | -0.399       | -0.469        | -0.369       | -0.471                | -0.248                  | -0.309                 | 0.386                 | 0.651                         | 0.047                            | 0.302                  | -0.176 | -0.266       | 0.337           | -0.026          | 0.100               | 0.458                 | 0.620                  | 0.292              | -0.060                      | -0.181                  | -0.291               | -0.209        |
|                               | 0.453      | 0.015         | 0.349          | 0.594      | 0.270              | 0.389         | 0.016        | 0.004         | 0.027        | 0.004                 | 0.144                   | 0.067                  | 0.020                 | <0.001                        | 0.787                            | 0.074                  | 0.304  | 0.117        | 0.044           | 0.879           | 0.561               | 0.005                 | 0.001                  | 0.084              | 0.726                       | 0.290                   | 0.085                | 0.222         |
| Protein (%dm)                 | 0.404      | -0.161        | 1.000          | -0.255     | -0.011             | 0.225         | -0.397       | -0.206        | 0.094        | 0.444                 | 0.195                   | 0.359                  | -0.060                | -0.636                        | -0.153                           | 0.066                  | 0.197  | 0.369        | -0.038          | 0.344           | 0.230               | -0.138                | -0.161                 | 0.319              | -0.591                      | 0.635                   | -0.176               | -0.574        |
|                               | 0.015      | 0.349         | 0.016          | 0.134      | 0.948              | 0.188         | 0.017        | 0.228         | 0.587        | 0.007                 | 0.255                   | 0.031                  | 0.970                 | <0.001                        | 0.734                            | 0.704                  | 0.250  | 0.027        | 0.827           | 0.040           | 0.177               | 0.421                 | 0.347                  | 0.058              | <0.001                      | <0.001                  | 0.304                | -0.001        |
| Fat (%dm)                     | -0.810     | 0.092         | -0.255         | 1.000      | -0.793             | 0.731         | 0.097        | 0.343         | 0.318        | -0.676                | -0.170                  | -0.754                 | 0.747                 | 0.358                         | -0.542                           | -0.499                 | 0.579  | -0.133       | 0.694           | -0.810          | -0.597              | -0.345                | -0.074                 | 0.063              | 0.376                       | -0.509                  | -0.655               | 0.166         |
|                               | <0.001     | 0.594         | 0.134          | <0.001     | <0.001             | <0.001        | 0.574        | 0.041         | 0.059        | <0.001                | 0.323                   | <0.001                 | <0.001                | 0.032                         | <0.001                           | 0.002                  | <0.001 | 0.438        | <0.001          | <0.001          | 0.039               | 0.669                 | 0.716                  | 0.024              | 0.002                       | <0.001                  | 0.332                |               |
| b-glucan (%dm)                | 0.772      | -0.189        | -0.011         | -0.793     | 1.000              | -0.729        | 0.229        | -0.242        | -0.136       | 0.714                 | 0.258                   | 0.702                  | -0.857                | -0.122                        | 0.498                            | 0.491                  | -0.458 | -0.148       | -0.836          | 0.693           | 0.407               | 0.104                 | -0.120                 | 0.153              | -0.014                      | 0.432                   | 0.831                | -0.028        |
|                               | <0.001     | 0.270         | 0.948          | <0.001     | <0.001             | <0.001        | 0.178        | 0.156         | 0.428        | <0.001                | 0.129                   | <0.001                 | <0.001                | 0.479                         | <0.001                           | 0.002                  | 0.002  | 0.005        | 0.390           | <0.001          | <0.001              | 0.144                 | 0.546                  | 0.487              | 0.372                       | 0.935                   | 0.009                | <0.001        |
| Mg (mg/kg dm)                 | -0.684     | 0.148         | 0.225          | 0.731      | -0.729             | 1.000         | 0.007        | 0.313         | 0.555        | -0.529                | 0.080                   | -0.518                 | 0.686                 | 0.124                         | -0.705                           | -0.425                 | 0.800  | 0.175        | 0.680           | -0.662          | -0.595              | -0.396                | -0.125                 | 0.114              | 0.011                       | -0.153                  | -0.765               | -0.091        |
|                               | <0.001     | 0.389         | 0.188          | <0.001     | <0.001             | <0.001        | 0.970        | 0.063         | <0.001       | <0.001                | 0.642                   | 0.001                  | <0.001                | 0.472                         | <0.001                           | 0.010                  | <0.001 | 0.307        | <0.001          | <0.001          | 0.017               | 0.469                 | 0.508                  | 0.950              | 0.373                       | <0.001                  | 0.596                |               |
| K (mg/kg dm)                  | -0.077     | -0.399        | -0.397         | 0.097      | 0.229              | 0.007         | 1.000        | 0.108         | 0.515        | 0.118                 | 0.330                   | 0.037                  | -0.279                | 0.148                         | 0.047                            | 0.044                  | 0.369  | -0.037       | -0.204          | -0.202          | -0.389              | -0.357                | -0.245                 | -0.127             | 0.698                       | 0.047                   | 0.289                | 0.333         |
|                               | 0.655      | 0.016         | 0.017          | 0.574      | 0.178              | 0.970         |              | 0.532         | 0.001        | 0.492                 | 0.049                   | 0.832                  | 0.100                 | 0.390                         | 0.787                            | 0.799                  | 0.027  | 0.829        | 0.232           | 0.238           | 0.019               | 0.033                 | 0.149                  | 0.459              | -0.001                      | 0.787                   | 0.087                | 0.447         |
| Ca (mg/kg dm)                 | -0.598     | -0.469        | -0.206         | 0.343      | -0.242             | 0.313         | 0.108        | 1.000         | 0.511        | -0.256                | 0.171                   | -0.121                 | 0.136                 | -0.100                        | -0.443                           | -0.731                 | 0.303  | 0.160        | 0.153           | -0.432          | -0.389              | -0.289                | -0.524                 | -0.530             | -0.119                      | -0.385                  | -0.114               | 0.479         |
|                               | <0.001     | 0.004         | 0.028          | 0.041      | 0.156              | 0.063         | 0.532        |               | 0.001        | 0.131                 | 0.318                   | 0.482                  | 0.400                 | 0.563                         | 0.007                            | <0.001                 | 0.725  | 0.303        | 0.373           | 0.009           | 0.019               | 0.087                 | <0.001                 | <0.001             | 0.490                       | 0.020                   | 0.510                | 0.035         |
| P (mg/kg dm)                  | -0.319     | -0.369        | 0.094          | 0.318      | -0.136             | 0.555         | 0.515        | 0.511         | 1.000        | -0.043                | 0.668                   | 0.088                  | 0.129                 | -0.050                        | -0.651                           | -0.505                 | 0.619  | 0.288        | 0.061           | -0.247          | -0.330              | -0.337                | -0.377                 | -0.221             | 0.209                       | 0.133                   | -0.053               | 0.206         |
|                               | 0.058      | 0.027         | 0.587          | 0.059      | 0.428              | <0.001        | 0.001        | 0.001         |              | 0.801                 | <0.001                  | 0.609                  | 0.453                 | 0.773                         | <0.001                           | 0.002                  | <0.001 | 0.088        | 0.725           | 0.147           | 0.049               | 0.044                 | 0.024                  | 0.196              | 0.221                       | 0.440                   | 0.759                | 0.228         |
| Diastatic power ("WK)         | 0.835      | -0.471        | 0.444          | -0.676     | 0.714              | -0.529        | 0.118        | -0.256        | -0.043       | 1.000                 | 0.250                   | 0.754                  | -0.647                | -0.508                        | 0.307                            | 0.445                  | -0.321 | 0.208        | -0.766          | 0.596           | 0.277               | -0.115                | -0.292                 | 0.177              | -0.198                      | 0.642                   | 0.635                | -0.211        |
|                               | <0.001     | 0.004         | 0.007          | <0.001     | <0.001             | <0.001        | 0.492        | 0.131         | 0.801        |                       | 0.141                   | <0.001                 | <0.001                | 0.002                         | 0.069                            | 0.007                  | 0.056  | 0.223        | <0.001          | 0.102           | 0.503               | 0.084                 | 0.303                  | 0.248              | <0.001                      | <0.001                  | 0.216                |               |
| Alpha-amylase (CU/g dm)       | 0.197      | -0.248        | 0.195          | -0.170     | 0.258              | 0.080         | 0.330        | 0.171         | 0.661        | 0.250                 | 1.000                   | 0.334                  | -0.348                | -0.070                        | -0.089                           | -0.063                 | 0.214  | 0.227        | -0.099          | 0.342           | 0.140               | -0.173                | -0.440                 | -0.187             | 0.056                       | 0.438                   | 0.265                | 0.245         |
|                               | 0.250      | 0.144         | 0.255          | 0.323      | 0.129              | 0.642         | 0.049        | 0.318         | <0.001       | 0.141                 |                         | 0.047                  | 0.038                 | 0.684                         | 0.607                            | 0.716                  | 0.211  | 0.183        | 0.565           | 0.401           | 0.417               | 0.314                 | 0.007                  | 0.274              | 0.747                       | 0.008                   | 0.118                | 0.150         |
| Beta-amylase (BSU/g dm)       | 0.714      | -0.309        | 0.359          | -0.754     | 0.702              | -0.518        | 0.037        | -0.121        | 0.088        | 0.754                 | 0.334                   | 1.000                  | -0.582                | -0.441                        | 0.159                            | 0.178                  | -0.221 | 0.235        | -0.789          | 0.708           | 0.468               | 0.259                 | -0.023                 | 0.082              | -0.378                      | 0.710                   | 0.700                | -0.331        |
|                               | <0.001     | 0.067         | 0.031          | <0.001     | <0.001             | 0.001         | 0.832        | 0.482         | 0.609        | <0.001                | 0.047                   |                        | <0.001                | 0.007                         | 0.356                            | 0.300                  | 0.110  | 0.167        | <0.001          | <0.001          | 0.004               | 0.127                 | 0.894                  | 0.635              | 0.023                       | <0.001                  | <0.001               | 0.049         |
| Gelatinization T (°C)         | -0.712     | 0.386         | -0.006         | 0.747      | -0.857             | 0.686         | -0.279       | 0.136         | 0.129        | -0.647                | -0.348                  | -0.582                 | 1.000                 | 0.355                         | -0.555                           | -0.425                 | 0.308  | 0.086        | 0.686           | -0.619          | -0.307              | 0.313                 | 0.307                  | -0.149             | 0.023                       | -0.410                  | -0.750               | -0.055        |
|                               | <0.001     | 0.020         | 0.970          | <0.001     | <0.001             | <0.001        | 0.100        | 0.430         | 0.453        | <0.001                | 0.038                   | <0.001                 |                       | 0.034                         | -0.001                           | 0.010                  | 0.068  | 0.619        | <0.001          | <0.001          | 0.069               | 0.446                 | 0.068                  | 0.387              | 0.892                       | 0.013                   | <0.001               | 0.750         |
| C-Saccharification time (min) | -0.377     | 0.651         | -0.636         | 0.358      | -0.122             | 0.124         | 0.148        | -0.100        | -0.508       | -0.070                | -0.441                  | 0.355                  | 1.000                 | 0.096                         | 0.081                            | 0.052                  | -0.451 | 0.262        | -0.240          | -0.144          | 0.225               | 0.255                 | -0.050                 | 0.427              | -0.457                      | -0.114                  | 0.317                |               |
|                               | 0.024      | <0.001        | <0.001         | 0.032      | 0.479              | 0.472         | 0.390        | 0.563         | 0.773        | 0.002                 | 0.684                   | 0.007                  | 0.034                 | 0.577                         | 0.638                            | 0.764                  | 0.006  | 0.123        | 0.159           | 0.402           | 0.187               | 0.134                 | 0.774                  | 0.009              | 0.005                       | 0.508                   | 0.060                |               |
| C-Filtrate60 (g)              | 0.513      | 0.047         | -0.153         | -0.542     | 0.498              | -0.705        | 0.047        | -0.443        | -0.651       | 0.307                 | -0.089                  | 0.159                  | -0.555                | 0.096                         | 1.000                            | 0.626                  | -0.441 | -0.263       | -0.249          | 0.500           | 0.358               | 0.142                 | 0.006                  | 0.072              | 0.031                       | 0.181                   | 0.390                | 0.038         |
|                               | <0.001     | 0.787         | 0.374          | <0.001     | 0.002              | <0.001        | 0.787        | 0.007         | <0.001       | 0.069                 | 0.607                   | 0.356                  | -0.001                | 0.577                         |                                  | <0.001                 | 0.007  | 0.122        | 0.143           | 0.002           | 0.032               | 0.409                 | 0.974                  | 0.678              | 0.860                       | 0.290                   | 0.019                | 0.826         |
| C-Extract content (°P)        | 0.634      | 0.302         | 0.066          | -0.499     | 0.491              | -0.425        | 0.044        | -0.731        | -0.505       | 0.445                 | -0.063                  | 0.178                  | -0.425                | 0.081                         | 0.626                            | 1.000                  | -0.355 | -0.059       | -0.242          | 0.367           | 0.141               | 0.029                 | 0.144                  | 0.414              | 0.067                       | 0.379                   | 0.246                | 0.823         |
|                               | <0.001     | 0.074         | 0.704          | 0.002      | 0.002              | 0.010         | 0.799        | <0.001        | 0.002        | 0.007                 | 0.716                   | 0.300                  | 0.010                 | 0.638                         | -0.001                           |                        | 0.034  | 0.731        | 0.154           | 0.028           | 0.411               | 0.868                 | 0.401                  | 0.012              | 0.699                       | 0.022                   | 0.148                | 0.095         |
| C-pH                          | -0.502     | -0.176        | 0.197          | 0.579      | -0.458             | 0.800         | 0.369        | 0.303         | 0.619        | -0.321                | 0.214                   | -0.271                 | 0.308                 | -0.052                        | -0.441                           | -0.355                 | 1.000  | 0.089        | 0.453           | -0.528          | -0.610              | -0.574                | -0.291                 | 0.206              | 0.139                       | 0.133                   | -0.475               | -0.176        |
|                               | 0.002      | 0.304         | 0.250          | <0.001     | 0.005              | <0.001        | 0.027        | 0.072         | <0.001       | 0.056                 | 0.211                   | 0.110                  | 0.068                 | 0.764                         | 0.007                            | 0.034                  |        | 0.606        | 0.005           | <0.001          | <0.001              | 0.001                 | 0.085                  | 0.229              | 0.418                       | 0.439                   | 0.003                | 0.304         |
| C-FAN (mg/L)                  | 0.006      | -0.266        | 0.369          | -0.133     | -0.148             | 0.175         | -0.037       | 0.160         | 0.288        | 0.208                 | 0.227                   | 0.235                  | 0.086                 | -0.451                        | -0.263                           | -0.059                 | 0.089  | 1.000        | 0.072           | 0.039           | -0.021              | 0.067                 | -0.007                 | -0.247             | -0.292                      | 0.322                   | -0.213               | 0.012         |
|                               | 0.971      | 0.117         | 0.027          | 0.438      | 0.390              | 0.307         | 0.829        | 0.350         | 0.088        | 0.223                 | 0.183                   | 0.167                  | 0.619                 | 0.006                         | 0.122                            | 0.731                  | 0.606  |              | 0.676           | 0.821           | 0.902               | 0.700                 | 0.968                  | 0.146              | 0.084                       | 0.056                   | 0.211                | 0.942         |
| C-Glucose (g/L)               | -0.691     | 0.337         | -0.028         | 0.694      | -0.836             | 0.680         | -0.204       | 0.153         | 0.061        | -0.766                | -0.099                  | -0.789                 | 0.686                 | 0.262                         | -0.249                           | -0.342                 | 0.453  | 0.072        | 1.000           | -0.593          | -0.364              | -0.171                | 0.027                  | -0.161             | 0.086                       | -0.347                  | -0.835               | 0.063         |
|                               | <0.001     | 0.044         | 0.827          | <0.001     | <0.001             | <0.001        | 0.232        | 0.373         | 0.725        | <0.001                | 0.565                   | <0.001                 | 0.123                 | 0.143                         | 0.154                            | 0.005                  | 0.676  |              | <0.001          | <0.001          | 0.029               | 0.319                 | 0.876                  | 0.348              | 0.617                       | 0.038                   | <0.001               | 0.716         |
| C-Maltose (g/L)               | 0.822      | -0.026        | 0.344          | -0.810     | 0.693              | -0.662        | -0.022       | -0.432        | -0.247       | 0.596                 | 0.342                   | 0.708                  | -0.619                | -0.240                        | 0.500                            | 0.367                  | -0.528 | 0.039        | -0.593          | 1.000           | 0.875               | 0.466                 | 0.137                  | 0.116              | -0.361                      | 0.601                   | 0.589                | -0.185        |
|                               | <0.001     | 0.879         | 0.040          | <0.001     | <0.001             | <0.001        | 0.238        | 0.009         | 0.147        | <0.001                | 0.041                   | <0.001                 | <0.001                | 0.159                         | 0.002                            | 0.028                  | <0.001 | 0.821        | <0.001          |                 | <0.001              | 0.044                 | 0.427                  | 0.499              | 0.031                       | <0.001                  | <0.001               | 0.280         |
| C-Maltotriose (g/L)           | 0.579      | 0.100         | 0.230          | -0.597     | 0.407              | -0.595        | -0.389       | -0.339        | 0.030        | 0.277                 | 0.140                   | 0.468                  | -0.307                | -0.144                        | 0.358                            | 0.141                  | -0.610 | -0.021       | -0.364          | 0.875           | 1.000               | 0.688                 | 0.376                  | -0.063             | -0.318                      | 0.314</                 |                      |               |

**Table S2:** Bivariate Spearman correlation coefficients with their corresponding two-tailed significances between characteristics of 12 unmalted adjuncts (barley, wheat, einkorn, emmer, spelt, khorasan, quinoa, amaranth, buckwheat, sorghum, teff and tritordeum) [thousand kernel weight (TKW, g), starch (% dm), protein (% dm), fat (% dm), beta-glucan (% dm), magnesium (Mg, mg/kg dm), potassium (K, mg/kg dm), calcium (Ca, mg/kg dm), phosphorus (P, mg/kg dm), diastatic power (°WK), alpha-amylase (CU/g dm), beta-amylase (B3U/g dm) and gelatinization temperature (°C)], the Congress mashing process characteristics with 60% barley malt and 40% pregelatinized unmalted adjunct [saccharification time (min) and filtrate mass after 60 min (g)] and the resulting wort characteristics [extract content (°P), pH, free amino nitrogen (FAN, mg/L), glucose (g/L), maltose (g/L), maltotriose (g/L), maltotetraose (g/L) and maltopentaose (g/L)].

|                               | TKW (g/dm) | Starch (g/dm) | Protein (g/dm) | Fat (g/dm) | Beta-glucan (g/dm) | Mg (mg/kg dm) | K (mg/kg dm) | Ca (mg/kg dm) | P (mg/kg dm) | Diastatic power (°WK) | Alpha-amylase (CU/g dm) | Beta-amylase (B3U/g dm) | Gelatinization T (°C) | C-Saccharification time (min) | C-Filtrate mass after 60 min (g) | C-Extract content (°P) | C-pH   | C-FAN (mg/L) | C-Glucose (g/L) | C-Maltose (g/L) | C-Maltotriose (g/L) | C-Maltotetraose (g/L) | C-Maltopentaose (g/L) |
|-------------------------------|------------|---------------|----------------|------------|--------------------|---------------|--------------|---------------|--------------|-----------------------|-------------------------|-------------------------|-----------------------|-------------------------------|----------------------------------|------------------------|--------|--------------|-----------------|-----------------|---------------------|-----------------------|-----------------------|
| TKW (g/dm)                    | 1.000      | -0.129        | 0.404          | -0.810     | 0.772              | -0.684        | -0.077       | -0.598        | -0.319       | 0.835                 | 0.197                   | 0.714                   | -0.712                | -0.376                        | 0.377                            | -0.058                 | -0.422 | -0.308       | -0.166          | 0.052           | 0.209               | 0.140                 | -0.030                |
|                               | 0.453      | 1.000         | 0.015          | -0.001     | -0.001             | -0.001        | 0.655        | -0.001        | 0.058        | -0.001                | 0.250                   | -0.001                  | 0.001                 | 0.024                         | 0.023                            | 0.737                  | 0.010  | 0.068        | 0.332           | 0.672           | 0.221               | 0.415                 | 0.866                 |
| Starch (g/dm)                 | -0.129     | 1.000         | -0.161         | 0.092      | -0.189             | 0.148         | -0.399       | -0.469        | -0.369       | -0.471                | -0.248                  | -0.309                  | 0.386                 | 0.372                         | 0.492                            | 0.472                  | 0.362  | 0.165        | -0.146          | 0.311           | 0.239               | 0.181                 | 0.097                 |
|                               | 0.453      | 0.015         | 0.349          | 0.594      | 0.270              | 0.389         | 0.016        | 0.004         | 0.027        | 0.004                 | 0.144                   | 0.067                   | 0.020                 | 0.025                         | 0.002                            | 0.004                  | 0.030  | 0.335        | 0.395           | 0.065           | 0.161               | 0.290                 | 0.575                 |
| Protein (g/dm)                | 0.404      | -0.161        | 1.000          | -0.255     | -0.011             | 0.225         | -0.397       | -0.206        | 0.094        | 0.444                 | 0.195                   | 0.359                   | -0.006                | -0.560                        | 0.232                            | -0.098                 | 0.193  | -0.226       | -0.176          | -0.049          | -0.065              | -0.080                | -0.321                |
|                               | 0.015      | 0.349         | 0.011          | 0.134      | 0.948              | 0.188         | 0.017        | 0.228         | 0.587        | 0.007                 | 0.255                   | 0.031                   | 0.970                 | -0.001                        | 0.174                            | 0.568                  | 0.261  | 0.185        | 0.304           | 0.778           | 0.705               | 0.645                 | 0.057                 |
| Fat (g/dm)                    | -0.810     | 0.092         | -0.255         | 1.000      | -0.793             | 0.731         | 0.097        | 0.343         | 0.318        | -0.676                | -0.170                  | -0.754                  | 0.747                 | 0.339                         | -0.141                           | 0.101                  | 0.424  | 0.007        | 0.287           | 0.053           | -0.051              | -0.014                | 0.187                 |
|                               | -0.001     | 0.594         | 0.134          | -0.001     | -0.001             | 0.574         | 0.041        | 0.059         | -0.001       | 0.323                 | -0.001                  | -0.001                  | 0.043                 | 0.414                         | 0.560                            | 0.010                  | 0.969  | 0.090        | 0.759           | 0.768           | 0.936               | 0.275                 |                       |
| β-glucan (g/dm)               | 0.772      | -0.189        | -0.011         | -0.793     | 1.000              | -0.729        | 0.229        | -0.242        | -0.136       | 0.714                 | 0.258                   | 0.702                   | -0.857                | -0.085                        | 0.092                            | 0.056                  | -0.498 | -0.054       | -0.197          | -0.082          | 0.085               | 0.119                 | 0.144                 |
|                               | -0.001     | 0.270         | 0.948          | -0.001     | -0.001             | 0.178         | 0.156        | 0.428         | -0.001       | 0.129                 | -0.001                  | 0.063                   | 0.593                 | 0.746                         | 0.002                            | 0.753                  | 0.249  | 0.635        | 0.623           | 0.488           | 0.402               |                       |                       |
| Mg (mg/kg dm)                 | -0.684     | 0.148         | 0.225          | 0.731      | -0.729             | 1.000         | 0.007        | 0.313         | 0.555        | -0.529                | 0.080                   | -0.518                  | 0.686                 | 0.105                         | -0.071                           | 0.148                  | 0.708  | 0.027        | -0.146          | -0.206          | -0.374              | -0.253                | -0.051                |
|                               | -0.001     | 0.389         | 0.188          | -0.001     | -0.001             | 0.970         | 0.063        | -0.001        | -0.001       | 0.642                 | 0.001                   | -0.001                  | 0.541                 | 0.680                         | 0.389                            | -0.001                 | 0.874  | 0.395        | 0.229           | 0.025           | 0.137               | 0.767                 |                       |
| K (mg/kg dm)                  | -0.077     | -0.399        | -0.397         | 0.097      | 0.229              | 0.007         | 1.000        | 0.108         | 0.515        | 0.118                 | 0.330                   | 0.037                   | -0.279                | 0.218                         | -0.191                           | -0.096                 | -0.064 | 0.037        | -0.232          | -0.617          | -0.504              | -0.283                | 0.249                 |
|                               | 0.655      | 0.016         | 0.017          | 0.574      | 0.178              | 0.970         | 0.000        | 0.532         | 0.001        | 0.492                 | 0.049                   | 0.832                   | 0.100                 | 0.202                         | 0.265                            | 0.578                  | 0.713  | 0.832        | 0.173           | -0.001          | 0.002               | 0.095                 | 0.143                 |
| Ca (mg/kg dm)                 | -0.598     | -0.469        | -0.206         | 0.343      | -0.242             | 0.313         | 0.108        | 1.000         | 0.511        | -0.256                | 0.171                   | -0.121                  | 0.136                 | 0.105                         | -0.426                           | -0.103                 | -0.004 | 0.213        | 0.249           | -0.172          | -0.293              | -0.258                | -0.107                |
|                               | -0.001     | 0.004         | 0.228          | 0.041      | 0.156              | 0.063         | 0.532        | 0.001         | 0.131        | 0.318                 | 0.482                   | 0.430                   | 0.543                 | -0.001                        | 0.550                            | 0.982                  | 0.213  | 0.143        | 0.317           | 0.083           | 0.128               | 0.534                 |                       |
| P (mg/kg dm)                  | -0.319     | -0.369        | 0.094          | 0.318      | -0.136             | 0.555         | 0.515        | 0.511         | 1.000        | -0.043                | 0.668                   | 0.088                   | 0.129                 | 0.100                         | -0.261                           | 0.013                  | 0.110  | 0.162        | -0.336          | -0.682          | -0.750              | -0.639                | -0.158                |
|                               | 0.058      | 0.027         | 0.587          | 0.059      | 0.428              | -0.001        | 0.001        | 0.001         | 0.801        | -0.001                | 0.609                   | 0.453                   | 0.562                 | 0.125                         | 0.938                            | 0.523                  | 0.345  | 0.045        | -0.001          | -0.001          | -0.001              | 0.356                 |                       |
| Diastatic power (°WK)         | 0.835      | -0.471        | 0.444          | -0.676     | 0.714              | -0.529        | 0.118        | -0.256        | -0.043       | 1.000                 | 0.250                   | 0.754                   | -0.647                | -0.277                        | 0.173                            | 0.011                  | -0.437 | -0.348       | -0.041          | -0.130          | 0.027               | 0.167                 | 0.138                 |
|                               | -0.001     | 0.004         | 0.007          | -0.001     | -0.001             | -0.001        | 0.492        | 0.131         | 0.801        | 0.141                 | -0.001                  | -0.001                  | 0.102                 | 0.313                         | 0.948                            | 0.008                  | 0.038  | 0.811        | 0.450           | 0.875           | 0.331               | 0.424                 |                       |
| Alpha-amylase (CU/g dm)       | 0.197      | -0.248        | 0.195          | -0.170     | 0.258              | 0.080         | 0.330        | 0.171         | 0.668        | 0.250                 | 1.000                   | 0.334                   | -0.348                | -0.068                        | 0.005                            | -0.044                 | -0.002 | 0.204        | -0.482          | -0.771          | -0.750              | -0.717                | -0.281                |
|                               | 0.250      | 0.144         | 0.255          | 0.323      | 0.129              | 0.642         | 0.049        | 0.318         | -0.001       | 0.141                 | 0.047                   | 0.038                   | 0.695                 | 0.975                         | 0.798                            | 0.992                  | 0.232  | 0.003        | -0.001          | -0.001          | -0.001              | 0.097                 |                       |
| Beta-amylase (B3U/g dm)       | 0.714      | -0.309        | 0.359          | -0.754     | 0.702              | -0.518        | 0.037        | -0.121        | 0.088        | 0.754                 | 0.334                   | 1.000                   | -0.582                | -0.262                        | 0.142                            | 0.096                  | -0.422 | -0.015       | -0.185          | -0.153          | -0.071              | -0.077                | -0.157                |
|                               | -0.001     | 0.067         | 0.031          | -0.001     | -0.001             | 0.001         | 0.832        | 0.482         | 0.609        | -0.001                | 0.047                   | -0.001                  | 0.123                 | 0.408                         | 0.577                            | 0.010                  | 0.932  | 0.280        | 0.374           | 0.680           | 0.657               | 0.359                 |                       |
| Gelatinization T (°C)         | -0.712     | 0.386         | -0.006         | 0.747      | -0.857             | 0.686         | -0.279       | 0.136         | 0.129        | -0.647                | -0.348                  | -0.582                  | 1.000                 | 0.395                         | 0.131                            | 0.306                  | 0.382  | 0.135        | 0.251           | 0.185           | 0.039               | 0.098                 | 0.105                 |
|                               | -0.001     | 0.020         | 0.970          | -0.001     | -0.001             | -0.001        | 0.100        | 0.430         | 0.453        | -0.001                | 0.038                   | -0.001                  | 0.017                 | 0.448                         | 0.070                            | 0.022                  | 0.434  | 0.140        | 0.279           | 0.821           | 0.570               | 0.540                 |                       |
| C-Saccharification time (min) | -0.376     | 0.372         | -0.560         | 0.339      | -0.085             | 0.105         | 0.218        | 0.105         | 0.100        | -0.277                | -0.068                  | -0.262                  | 0.395                 | 1.000                         | 0.249                            | 0.740                  | -0.024 | 0.421        | 0.177           | -0.229          | 0.001               | 0.304                 | 0.685                 |
|                               | 0.024      | 0.025         | -0.001         | 0.043      | 0.623              | 0.541         | 0.202        | 0.543         | 0.562        | 0.102                 | 0.695                   | 0.123                   | 0.017                 | 0.142                         | -0.001                           | 0.889                  | 0.010  | 0.300        | 0.866           | 0.996           | 0.071               | -0.001                |                       |
| C-Filtrate60 (g)              | 0.377      | 0.492         | 0.232          | -0.141     | 0.092              | -0.071        | -0.191       | -0.626        | -0.261       | 0.173                 | 0.005                   | 0.142                   | 0.131                 | 0.249                         | 1.000                            | 0.549                  | 0.156  | -0.126       | 0.069           | 0.151           | 0.199               | 0.347                 | 0.364                 |
|                               | 0.023      | 0.002         | 0.174          | 0.414      | 0.593              | 0.680         | 0.265        | -0.001        | 0.125        | 0.313                 | 0.975                   | 0.408                   | 0.448                 | 0.142                         | -0.001                           | 0.364                  | 0.464  | 0.689        | 0.379           | 0.244           | 0.038               | 0.029                 |                       |
| C-Extract content (°P)        | -0.058     | 0.472         | -0.098         | 0.101      | 0.056              | 0.148         | -0.096       | -0.103        | 0.013        | 0.011                 | -0.044                  | 0.096                   | 0.306                 | 0.740                         | 0.549                            | 1.000                  | 0.173  | 0.188        | 0.136           | 0.111           | 0.112               | 0.440                 | 0.647                 |
|                               | 0.737      | 0.004         | 0.568          | 0.560      | 0.746              | 0.389         | 0.578        | 0.550         | 0.938        | 0.948                 | 0.798                   | 0.577                   | 0.070                 | -0.001                        | -0.001                           | 0.312                  | 0.273  | 0.429        | 0.518           | 0.514           | 0.007               | -0.001                |                       |
| C-pH                          | -0.422     | 0.362         | 0.193          | 0.424      | -0.498             | 0.708         | -0.064       | -0.004        | 0.110        | -0.437                | -0.002                  | -0.422                  | 0.382                 | -0.024                        | 0.156                            | 0.173                  | 1.000  | -0.033       | -0.147          | -0.141          | -0.270              | -0.114                | 0.017                 |
|                               | 0.010      | 0.030         | 0.261          | 0.010      | 0.002              | -0.001        | 0.713        | 0.982         | 0.523        | 0.008                 | 0.992                   | 0.010                   | 0.022                 | 0.889                         | 0.364                            | 0.312                  | 0.850  | 0.392        | 0.410           | 0.111           | 0.509               | 0.920                 |                       |
| C-FAN (mg/L)                  | -0.308     | 0.165         | -0.226         | 0.007      | -0.054             | 0.027         | 0.037        | 0.213         | 0.162        | -0.348                | 0.204                   | -0.015                  | 0.135                 | 0.421                         | -0.126                           | 0.188                  | -0.033 | 1.000        | -0.291          | -0.314          | -0.288              | -0.244                | -0.073                |
|                               | 0.068      | 0.335         | 0.185          | 0.969      | 0.753              | 0.874         | 0.832        | 0.213         | 0.345        | 0.038                 | 0.232                   | 0.932                   | 0.434                 | 0.010                         | 0.464                            | 0.273                  | 0.850  | 0.085        | 0.062           | 0.089           | 0.151               | 0.673                 |                       |
| C-Glucose (g/L)               | -0.166     | -0.146        | -0.176         | 0.287      | -0.197             | -0.146        | -0.232       | 0.249         | -0.336       | -0.041                | -0.482                  | -0.185                  | 0.251                 | 0.177                         | 0.069                            | 0.136                  | -0.147 | -0.291       | 1.000           | 0.602           | 0.604               | 0.584                 | 0.392                 |
|                               | 0.332      | 0.395         | 0.304          | 0.090      | 0.249              | 0.395         | 0.173        | 0.143         | 0.045        | 0.811                 | 0.003                   | 0.280                   | 0.140                 | 0.300                         | 0.689                            | 0.429                  | 0.392  | 0.085        | -0.001          | -0.001          | -0.001              | 0.018                 |                       |
| C-Maltose (g/L)               | 0.052      | 0.311         | -0.049         | 0.053      | -0.082             | -0.206        | -0.617       | -0.172        | -0.682       | -0.130                | -0.771                  | -0.153                  | 0.185                 | -0.029                        | 0.151                            | 0.111                  | -0.141 | -0.314       | 0.602           | 1.000           | 0.949               | 0.692                 | 0.172                 |
|                               | 0.762      | 0.065         | 0.778          | 0.759      | 0.635              | 0.229         | -0.001       | 0.317         | -0.001       | 0.450                 | -0.001                  | 0.374                   | 0.279                 | 0.866                         | 0.379                            | 0.518                  | 0.410  | 0.062        | -0.001          | -0.001          | -0.001              | 0.316                 |                       |
| C-Maltotriose (g/L)           | 0.209      | 0.239         | -0.065         | -0.051     | 0.085              | -0.374        | -0.504       | -0.293        | -0.750       | 0.027                 | -0.750                  | -0.071                  | 0.039                 | 0.001                         | 0.199                            | 0.112                  | -0.270 | -0.288       | 0.604           | 0.949           | 1.000               | 0.782                 | 0.286                 |
|                               | 0.221      | 0.161         | 0.705          | 0.768      | 0.623              | 0.025         | 0.002        | 0.083         | -0.001       | 0.875                 | -0.001                  | 0.680                   | 0.821                 | 0.996                         | 0.244                            | 0.514                  | 0.111  | 0.089        | -0.001          | -0.001          | -0.001              | 0.090                 |                       |
| C-Maltotetraose (g/L)         | 0.140      | 0.181         | -0.080         | -0.014     | 0.119              | -0.253        | -0.283       | -0.258        | -0.639       | 0.167                 | -0.717                  | -0.077                  | 0.098                 | 0.304                         | 0.347                            | 0.440                  | -0.114 | -0.244       | 0.584           | 0.692           | 0.782               | 1.000                 | 0.713                 |
|                               | 0.415      | 0.290         | 0.645          | 0.936      | 0.488              | 0.137         | 0.095        | 0.128         | -0.001       | 0.331                 | -0.001                  | 0.657                   | 0.570                 | 0.071                         | 0.038                            | 0.007                  | 0.509  | 0.151        | -0.001          | -0.001          | -0.001              | -0.001                |                       |
| C-Maltopentaose (g/L)         | -0.030     | 0.097         | -0.321         | 0.187      | 0.144              | -0.051        | 0.249        | -0.107        | -0.158       | 0.138                 | -0.281                  | -0.157                  | 0.105                 | 0.689                         | 0.364                            | 0.647                  | 0.017  | -0.073       | 0.392           | 0.172           | 0.286               | 0.713                 | 1.000                 |
|                               | 0.860      | 0.575         | 0.057          | 0.275      | 0.402              | 0.767         | 0.143        | 0.534         | 0.356        | 0.424                 | 0.097                   | 0.359                   | 0.540                 | -0.001                        | 0.029                            | -0.001                 | 0.920  | 0.673        | 0.018           | 0.316           | 0.090               | -0.001                |                       |

**Table S3:** Bivariate Spearman correlation coefficients with their corresponding two-tailed significances between characteristics of 12 unmalted adjuncts (barley, wheat, einkorn, emmer, spelt, khorasan, quinoa, amaranth, buckwheat, sorghum, teff and tritordeum) [thousand kernel weight (TKW, g), starch (% dm), protein (% dm), fat (% dm), beta-glucan (% dm), magnesium (Mg, mg/kg dm), potassium (K, mg/kg dm), calcium (Ca, mg/kg dm), phosphorus (P, mg/kg dm), diastatic power (°WK), alpha-amylase (CU/g dm), beta-amylase (B3U/g dm) and gelatinization temperature (°C)], the Evans mashing process characteristics with 60% barley malt and 40% unmalted adjunct [saccharification time (min) and filtrate mass after 60 min (g)] and the resulting wort characteristics [extract content (°P), pH, free amino nitrogen (FAN, mg/L), glucose (g/L), maltose (g/L), maltotriose (g/L), maltotetraose (g/L) and maltopentaose (g/L)].

|                               | TKW (g dm) | Starch (% dm) | Protein (% dm) | Fat (% dm) | Beta-glucan (% dm) | Mg (mg/kg dm) | K (mg/kg dm) | Ca (mg/kg dm) | P (mg/kg dm) | Diastatic power (°WK) | Alpha-amylase (CU/g dm) | Beta-amylase (B3U/g dm) | Gelatinization T (°C) | C-Saccharification time (min) | C-Filtrate mass after 60 min (g) | C-Extract content (°P) | CpH    | C-FAN (mg/L) | C-Glucose (g/L) | C-Maltose (g/L) | C-Maltotriose (g/L) | C-Maltotetraose (g/L) | C-Maltopentaose (g/L) |
|-------------------------------|------------|---------------|----------------|------------|--------------------|---------------|--------------|---------------|--------------|-----------------------|-------------------------|-------------------------|-----------------------|-------------------------------|----------------------------------|------------------------|--------|--------------|-----------------|-----------------|---------------------|-----------------------|-----------------------|
| TKW (g dm)                    | 1.000      | -0.129        | 0.404          | -0.810     | 0.772              | -0.684        | -0.077       | -0.598        | -0.319       | 0.835                 | 0.197                   | 0.714                   | -0.712                | 0.064                         | -0.149                           | 0.667                  | -0.165 | 0.098        | -0.250          | 0.650           | 0.658               | 0.484                 | 0.248                 |
|                               |            | 0.453         | 0.015          | <0.001     | <0.001             | <0.001        | 0.655        | <0.001        | 0.058        | <0.001                | 0.250                   | <0.001                  | 0.713                 | 0.384                         | -0.001                           | 0.335                  | 0.569  | 0.142        | -0.001          | <0.001          | <0.001              | 0.003                 | 0.045                 |
| Starch (%dm)                  | -0.129     | 1.000         | -0.161         | 0.092      | -0.189             | 0.148         | -0.399       | -0.469        | -0.369       | -0.471                | -0.248                  | -0.309                  | 0.386                 | 0.197                         | 0.055                            | 0.159                  | -0.228 | -0.222       | -0.200          | -0.326          | -0.334              | 0.014                 | 0.266                 |
|                               | 0.453      |               | 0.349          | 0.594      | 0.270              | 0.389         | 0.016        | 0.004         | 0.027        | 0.004                 | 0.144                   | 0.067                   | 0.020                 | 0.251                         | 0.748                            | 0.356                  | 0.181  | 0.194        | 0.243           | 0.052           | 0.047               | 0.937                 | 0.117                 |
| Protein (%dm)                 | 0.404      | -0.161        | 1.000          | -0.255     | -0.011             | 0.225         | -0.397       | -0.206        | 0.094        | 0.444                 | 0.195                   | 0.359                   | -0.006                | 0.047                         | -0.008                           | 0.271                  | 0.454  | -0.282       | -0.151          | -0.015          | -0.045              | -0.021                | 0.036                 |
|                               | 0.015      | 0.349         |                | 0.134      | 0.948              | 0.188         | 0.017        | 0.228         | 0.587        | 0.007                 | 0.255                   | 0.031                   | 0.970                 | 0.784                         | 0.961                            | 0.110                  | 0.005  | 0.096        | 0.381           | 0.929           | 0.796               | 0.902                 | 0.836                 |
| Fat (%dm)                     | -0.810     | 0.092         | -0.255         | 1.000      | -0.793             | 0.731         | 0.097        | 0.343         | 0.318        | -0.676                | -0.170                  | -0.754                  | 0.747                 | 0.334                         | 0.325                            | -0.387                 | 0.347  | -0.133       | 0.425           | -0.736          | -0.727              | -0.506                | -0.313                |
|                               | <0.001     | 0.594         | 0.134          | <0.001     | <0.001             | 0.574         | 0.041        | 0.059         | -0.001       | 0.323                 | <0.001                  | 0.046                   | 0.053                 | 0.020                         | 0.038                            | 0.438                  | 0.010  | <0.001       | <0.001          | <0.001          | 0.002               | 0.063                 |                       |
| b-glucan (%dm)                | 0.772      | -0.189        | -0.011         | -0.793     | 1.000              | -0.729        | 0.229        | -0.242        | -0.136       | 0.714                 | 0.258                   | 0.702                   | -0.857                | -0.193                        | -0.283                           | 0.508                  | -0.410 | 0.340        | -0.268          | 0.771           | 0.765               | 0.470                 | 0.220                 |
|                               | <0.001     | 0.270         | 0.948          | <0.001     | <0.001             | 0.178         | 0.156        | 0.428         | -0.001       | 0.129                 | <0.001                  | <0.001                  | 0.259                 | 0.094                         | 0.002                            | 0.013                  | 0.043  | 0.113        | <0.001          | <0.001          | 0.004               | 0.197                 |                       |
| Mg (mg/kg dm)                 | -0.684     | 0.148         | 0.225          | 0.731      | -0.729             | 1.000         | 0.007        | 0.313         | 0.555        | -0.529                | 0.080                   | -0.518                  | 0.686                 | 0.127                         | 0.019                            | -0.221                 | 0.629  | -0.159       | 0.203           | -0.784          | -0.825              | -0.658                | -0.376                |
|                               | <0.001     | 0.389         | 0.188          | <0.001     | <0.001             | 0.970         | 0.063        | <0.001        | <0.001       | 0.642                 | 0.001                   | <0.001                  | 0.460                 | 0.912                         | 0.196                            | -0.001                 | 0.355  | 0.235        | -0.001          | <0.001          | <0.001              | 0.024                 |                       |
| K (mg/kg dm)                  | -0.077     | -0.399        | -0.397         | 0.097      | 0.229              | 0.007         | 1.000        | 0.108         | 0.515        | 0.118                 | 0.330                   | 0.037                   | -0.229                | -0.036                        | -0.320                           | 0.210                  | 0.227  | 0.698        | 0.188           | -0.020          | 0.000               | -0.133                | -0.403                |
|                               | 0.655      | 0.016         | 0.017          | 0.574      | 0.178              | 0.970         |              | 0.532         | 0.001        | 0.492                 | 0.049                   | 0.832                   | 0.100                 | 0.833                         | 0.057                            | 0.219                  | 0.183  | <0.001       | 0.271           | 0.907           | 0.999               | 0.439                 | 0.015                 |
| Ca (mg/kg dm)                 | -0.598     | -0.469        | -0.206         | 0.343      | -0.242             | 0.313         | 0.108        | 1.000         | 0.511        | -0.256                | 0.171                   | -0.121                  | 0.136                 | -0.339                        | 0.139                            | -0.679                 | 0.023  | -0.096       | 0.207           | 0.025           | -0.012              | -0.245                | -0.202                |
|                               | <0.001     | 0.004         | 0.228          | 0.041      | 0.156              | 0.063         | 0.532        | <0.001        | 0.131        | 0.318                 | 0.482                   | 0.430                   | 0.043                 | 0.419                         | -0.001                           | 0.896                  | 0.577  | 0.226        | 0.886           | 0.943           | 0.149               | 0.236                 |                       |
| P (mg/kg dm)                  | -0.319     | -0.369        | 0.094          | 0.318      | -0.136             | 0.555         | 0.515        | 0.511         | 1.000        | -0.043                | 0.668                   | 0.088                   | 0.129                 | -0.197                        | -0.135                           | -0.112                 | 0.559  | 0.272        | 0.039           | -0.141          | -0.184              | -0.394                | -0.498                |
|                               | 0.058      | 0.027         | 0.587          | 0.059      | 0.428              | <0.001        | 0.001        | 0.001         |              | 0.801                 | <0.001                  | 0.609                   | 0.453                 | 0.251                         | 0.432                            | 0.516                  | <0.001 | 0.108        | 0.821           | 0.412           | 0.282               | 0.017                 | 0.002                 |
| Diastatic power (°WK)         | 0.835      | -0.471        | 0.444          | -0.676     | 0.714              | -0.529        | 0.118        | -0.256        | -0.043       | 1.000                 | 0.250                   | 0.754                   | -0.647                | -0.029                        | -0.159                           | 0.439                  | -0.056 | 0.051        | -0.196          | 0.591           | 0.587               | 0.427                 | 0.176                 |
|                               | <0.001     | 0.004         | 0.007          | <0.001     | <0.001             | 0.492         | 0.131        | 0.801         |              | 0.141                 | <0.001                  | -0.001                  | 0.868                 | 0.356                         | 0.007                            | 0.746                  | 0.767  | 0.252        | -0.001          | -0.001          | 0.009               | 0.303                 |                       |
| Alpha-amylase (CU/g dm)       | 0.197      | -0.248        | 0.195          | -0.170     | 0.258              | 0.080         | 0.330        | 0.171         | 0.668        | 0.250                 | 1.000                   | 0.334                   | -0.348                | -0.163                        | -0.153                           | 0.254                  | 0.414  | 0.291        | -0.101          | 0.267           | 0.218               | -0.194                | -0.435                |
|                               | 0.250      | 0.144         | 0.255          | 0.323      | 0.129              | 0.642         | 0.049        | 0.318         | -0.001       | 0.141                 |                         | 0.047                   | 0.038                 | 0.342                         | 0.374                            | 0.135                  | 0.012  | 0.086        | 0.558           | 0.116           | 0.201               | 0.257                 | 0.008                 |
| Beta-amylase (B3U/g dm)       | 0.714      | -0.309        | 0.359          | -0.754     | 0.702              | -0.518        | 0.037        | -0.121        | 0.088        | 0.754                 | 0.334                   | 1.000                   | -0.582                | -0.318                        | -0.204                           | 0.273                  | -0.176 | 0.147        | -0.420          | 0.693           | 0.666               | 0.498                 | 0.197                 |
|                               | <0.001     | 0.067         | 0.031          | <0.001     | <0.001             | 0.001         | 0.832        | 0.482         | 0.609        | -0.001                | 0.047                   |                         | <0.001                | 0.059                         | 0.233                            | 0.108                  | 0.304  | 0.393        | 0.011           | <0.001          | <0.001              | 0.002                 | 0.249                 |
| Gelatinization T (°C)         | -0.712     | 0.386         | -0.006         | 0.747      | -0.857             | 0.686         | -0.279       | 0.136         | 0.129        | -0.647                | -0.348                  | -0.582                  | 1.000                 | 0.254                         | 0.434                            | -0.497                 | 0.224  | -0.421       | 0.071           | -0.770          | -0.756              | -0.250                | 0.027                 |
|                               | <0.001     | 0.020         | 0.970          | <0.001     | <0.001             | <0.001        | 0.100        | 0.430         | 0.453        | <0.001                | 0.038                   | -0.001                  |                       | 0.134                         | 0.008                            | 0.002                  | 0.188  | 0.011        | 0.683           | <0.001          | <0.001              | 0.141                 | 0.877                 |
| C-Saccharification time (min) | 0.064      | 0.197         | 0.047          | 0.334      | -0.193             | 0.127         | -0.036       | -0.339        | -0.197       | -0.029                | -0.163                  | -0.318                  | 0.254                 | 1.000                         | 0.592                            | 0.379                  | 0.229  | -0.209       | 0.636           | -0.289          | -0.269              | -0.103                | -0.087                |
|                               | 0.713      | 0.251         | 0.784          | 0.046      | 0.259              | 0.460         | 0.833        | 0.043         | 0.251        | 0.868                 | 0.342                   | 0.059                   | 0.134                 |                               | <0.001                           | 0.023                  | 0.179  | 0.221        | <0.001          | 0.088           | 0.112               | 0.549                 | 0.612                 |
| C-Filtrate50 (g)              | -0.149     | 0.055         | -0.008         | 0.325      | -0.283             | 0.019         | -0.320       | 0.139         | -0.135       | -0.159                | -0.153                  | -0.204                  | 0.434                 | 0.592                         | 1.000                            | -0.226                 | -0.148 | -0.455       | 0.348           | -0.067          | -0.034              | 0.252                 | 0.295                 |
|                               | 0.384      | 0.748         | 0.961          | 0.053      | 0.094              | 0.912         | 0.057        | 0.419         | 0.432        | 0.356                 | 0.374                   | 0.233                   | 0.008                 | <0.001                        |                                  | 0.184                  | 0.387  | 0.005        | 0.037           | 0.699           | 0.846               | 0.138                 | 0.081                 |
| C-Extract content (°P)        | 0.667      | 0.159         | 0.271          | -0.387     | 0.508              | -0.221        | 0.210        | -0.679        | -0.112       | 0.439                 | 0.254                   | 0.273                   | -0.497                | 0.379                         | -0.226                           | 1.000                  | 0.191  | 0.345        | 0.105           | 0.201           | 0.196               | 0.083                 | -0.063                |
|                               | <0.001     | 0.356         | 0.110          | 0.020      | 0.002              | 0.196         | 0.219        | <0.001        | 0.516        | 0.007                 | 0.135                   | 0.108                   | 0.002                 | 0.023                         | 0.184                            | 0.264                  | 0.040  | 0.541        | 0.239           | 0.252           | 0.631               | 0.713                 |                       |
| C-pH                          | -0.165     | -0.228        | 0.454          | 0.347      | -0.410             | 0.629         | 0.227        | 0.023         | 0.559        | -0.056                | 0.414                   | -0.176                  | 0.224                 | 0.229                         | -0.148                           | 0.191                  | 1.000  | 0.196        | 0.325           | -0.423          | -0.454              | -0.660                | -0.680                |
|                               | 0.335      | 0.181         | 0.005          | 0.038      | 0.013              | <0.001        | 0.183        | 0.896         | <0.001       | 0.746                 | 0.012                   | 0.304                   | 0.188                 | 0.179                         | 0.387                            | 0.264                  |        | 0.252        | 0.053           | 0.010           | 0.005               | -0.001                | -0.001                |
| C-FAN (mg/L)                  | 0.098      | -0.222        | -0.282         | -0.133     | 0.340              | -0.159        | 0.698        | -0.096        | 0.272        | 0.051                 | 0.291                   | 0.147                   | -0.421                | -0.209                        | -0.455                           | 0.345                  | 0.196  | 1.000        | 0.082           | 0.201           | 0.208               | -0.042                | -0.320                |
|                               | 0.569      | 0.194         | 0.096          | 0.438      | 0.043              | 0.355         | -0.001       | 0.577         | 0.108        | 0.767                 | 0.086                   | 0.393                   | 0.011                 | 0.221                         | 0.005                            | 0.040                  | 0.252  |              | 0.636           | 0.240           | 0.224               | 0.807                 | 0.057                 |
| C-Glucose (g/L)               | -0.250     | -0.200        | -0.151         | 0.425      | -0.268             | 0.203         | 0.188        | 0.207         | 0.039        | -0.196                | -0.101                  | -0.420                  | 0.071                 | 0.636                         | 0.348                            | 0.105                  | 0.325  | 0.082        | 1.000           | -0.082          | -0.079              | -0.281                | -0.279                |
|                               | 0.142      | 0.243         | 0.381          | 0.010      | 0.113              | 0.235         | 0.271        | 0.226         | 0.821        | 0.252                 | 0.558                   | 0.011                   | 0.683                 | <0.001                        | 0.037                            | 0.541                  | 0.053  | 0.636        |                 | 0.633           | 0.646               | 0.097                 | 0.100                 |
| C-Maltose (g/L)               | 0.650      | -0.326        | -0.015         | -0.736     | 0.771              | -0.784        | -0.020       | 0.025         | -0.141       | 0.591                 | 0.267                   | 0.693                   | -0.770                | -0.289                        | -0.067                           | 0.201                  | -0.423 | 0.201        | -0.082          | 1.000           | 0.992               | 0.553                 | 0.287                 |
|                               | <0.001     | 0.052         | 0.929          | <0.001     | <0.001             | 0.907         | 0.886        | 0.412         | <0.001       | 0.116                 | <0.001                  | 0.001                   | 0.088                 | 0.699                         | 0.239                            | 0.010                  | 0.240  | 0.633        |                 | <0.001          | <0.001              | 0.089                 | 0.089                 |
| C-Maltotriose (g/L)           | 0.658      | -0.334        | -0.045         | -0.727     | 0.765              | -0.825        | 0.000        | -0.012        | -0.184       | 0.587                 | 0.218                   | 0.666                   | -0.756                | -0.269                        | -0.034                           | 0.196                  | -0.454 | 0.208        | -0.079          | 0.992           | 1.000               | 0.608                 | 0.329                 |
|                               | <0.001     | 0.047         | 0.796          | <0.001     | <0.001             | <0.001        | 0.999        | 0.943         | 0.282        | <0.001                | 0.201                   | <0.001                  | <0.001                | 0.112                         | 0.846                            | 0.252                  | 0.005  | 0.224        | 0.646           |                 | <0.001              | 0.050                 | 0.050                 |
| C-Maltotetraose (g/L)         | 0.484      | 0.014         | -0.021         | -0.506     | 0.470              | -0.658        | -0.133       | -0.245        | -0.394       | 0.427                 | -0.194                  | 0.498                   | -0.250                | -0.103                        | 0.252                            | 0.083                  | -0.660 | -0.042       | -0.281          | 0.553           | 0.608               | 1.000                 | 0.844                 |
|                               | 0.003      | 0.937         | 0.902          | 0.002      | 0.004              | -0.001        | 0.439        | 0.149         | 0.017        | 0.009                 | 0.257                   | 0.002                   | 0.141                 | 0.549                         | 0.138                            | 0.631                  | <0.001 | 0.807        | 0.097           | <0.001          | <0.001              | -0.001                | -0.001                |
| C-Maltopentaose (g/L)         | 0.248      | 0.266         | 0.036          | -0.313     | 0.220              | -0.376        | -0.403       | -0.202        | -0.498       | 0.176                 | -0.435                  | 0.197                   | 0.027                 | -0.087                        | 0.295                            | -0.063                 | -0.680 | -0.320       | -0.279          | 0.287           | 0.329               | 0.844                 | 1.000                 |
|                               | 0.145      | 0.117         | 0.836          | 0.063      | 0.197              | 0.024         | 0.015        | 0.236         | 0.002        | 0.303                 | 0.008                   | 0.249                   | 0.877                 | 0.612                         | 0.081                            | 0.713                  | -0.001 | 0.057        | 0.100           | 0.089           | 0.050               | -0.001                | -0.001                |
